# Supplementary material for: Nalbuphine suppresses breast cancer stem-like properties and epithelial-mesenchymal transition via the AKT-NFκB signaling pathway
Source: J Exp Clin Cancer Res. 2019 May 15;38:197. doi: 10.1186/s13046-019-1184-1 (PMC6521451; doi:10.1186/s13046-019-1184-1)
Supplement: Supplementary file 7 — Table S7. IC50 of nalbuphine in MDA-MB-231, MCF-7 and SK-BR-3 cells. (XLSX 9 kb) [file 13046_2019_1184_MOESM7_ESM.xlsx]

## Sheet: Sheet1
50% Inhibitory Concentration (IC50) (μM)
Cell Lines Time	24 hr	48 hr	72 hr
MDA-MB-231	947.33	601.52	672.98
MCF-7	929.5	697.83	539.51
SK-BR-3	714.91	534.87	290.74
